# Supplementary material
Source: Springer Nature journal article supplement (https://www.springermedizin.de/resource/supplementary/12884_2009_223_MOESM1_ESM.pdf/9459878)

Labour started at  
CDW  
 $n=201$   
(CDW-cohort)

Labour started at  
MLW  
 $n=252$   
(MLW-cohort)

Transfer during labour  
 $n=74$

Labour completed at  
CDW  
 $n=275$

Labour completed at  
MLW  
 $n=178$

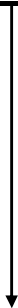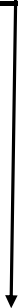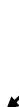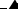

Supplement: MOESM1 [file 9459878]
